1 **Risk factors and protective factors of mental health**  
2 **during COVID-19 outbreak and lockdown in adult**  
3 **Indian population- A cross-sectional study**

4

5 Saikarthik Jayakumar<sup>1</sup>, Saraswathi Ilango<sup>2</sup>, Siva Thirusangu<sup>3</sup>

6

7

8 <sup>1</sup> Assistant Professor of Anatomy, Department of Basic Medical Sciences, Majmaah  
9 University, Saudi Arabia

10 <sup>2</sup> Assistant Professor of Physiology, Madha Medical College and Research Institute,  
11 Chennai, India and PhD Research Scholar, Bharath Institute of Higher Education and  
12 Research, Chennai, India

13 <sup>3</sup>Tutor in Anatomy, Sri Ramachandra Medical College and Research Centre, India

14

15

16

17 Corresponding Author:

18 Dr Saikarthik Jayakumar

19 Email: s.jaya@mu.edu.sa

20 ¶ All authors contributed equally to this research work.

21 No conflict of Interest

## 22 Abstract

23 **Background:** The novel Corona virus has derailed the entire world and various  
24 steps have been taken by the health authorities to tackle this pandemic. Nationwide  
25 lockdown has been imposed to control the spread of COVID-19 outbreak in India,  
26 which could have psychological impact on the population. **Aim:** Our study aims to  
27 study the effect of the COVID-19 outbreak & subsequent lockdown on mental health  
28 status of adult Indian population along with identifying the high-risk groups.  
29 **Methodology:** An online survey was conducted during 3<sup>rd</sup> phase of lockdown  
30 gathering details about sociodemographic variables, practice of precautionary  
31 measures, awareness and concerns regarding COVID-19 and mental health status  
32 of the participants through DASS21 questionnaire from 873 adults. **Results:** The  
33 prevalence of depression, anxiety and stress were 18.56%, 25.66%, and 21.99%  
34 respectively including higher number of participants with mild depression (15.1%)  
35 and stress (14.5%) and moderate anxiety (16.3%). Female gender, age <25 years,  
36 unemployment, self-business, employed in private sector, lack of formal education,  
37 larger household size, parenthood (>2 kids) were associated with increased  
38 likelihood of negative mental health. Confidence in physician's ability to diagnose  
39 COVID-19 infection, decreased self-perceived likelihood of contracting COVID-19,  
40 lesser frequency of checking for information on COVID-19 and satisfaction of  
41 information received were protective against negative mental health. **Conclusion:**  
42 This landmark study identified the protective and risk factors of mental health during  
43 COVID-19 pandemic, to help authorities and mental health workers to strategize and  
44 deliver interventional methods to maintain psychosocial wellbeing of the population.

45 **Keywords:** COVID-19, lockdown, mental health, risk factors, protective factors,  
46 depression, anxiety, stress, India

## 47 **Introduction**

48 COVID-19 outbreak, caused by a novel corona virus, SARS-CoV-2, which originated  
49 from China, has spread worldwide, earning the pandemic status by WHO on March  
50 11, 2020 [1]. As of the 1<sup>st</sup> week of June, 2020, India has emerged as the fifth hardest  
51 hit country with 247,000 confirmed cases of COVID-19 and 7000 deaths [2].  
52 Droplets, contact with immediate environment around infected persons including  
53 direct or indirect and airborne in specific circumstances are the main proposed  
54 routes of transmission [3].

55 As of now, there are no specific medicines or vaccines available for COVID-19. To  
56 tackle this, the Government of India has opted for nationwide lockdown and  
57 emphasized on social distancing. Though quarantine and lockdown help containing  
58 the spread of infection, it is also accompanied by potential psychological distress in  
59 the population. Isolation, fear of contracting the disease, confusion created by  
60 rumours, financial strain, apprehension regarding job security, boredom, frustrations,  
61 lack of freedom and space due to restrictions, alcohol withdrawal, concerns for the  
62 family members that occur during lockdown period could affect the mental health of  
63 the population to varying degrees.

64 Studies conducted during earlier epidemics like SARS, equine influenza, Ebola have  
65 noted that there was increased psychological distress due to the epidemic and  
66 quarantine [4, 5]. Similarly, studies conducted recently in other countries like China,  
67 Italy, Iran have noted increased prevalence of mental health disorders like  
68 depression, anxiety, stress and sleep disturbances during COVID-19 outbreak [6-8].

69 A recent survey conducted on March 2020 in India, has found that more than three  
70 fourth of the study participants had self-perceived need for help for their mental well-  
71 being [9].

72 Till date, very few studies have been conducted on the psychological impact of  
73 COVID-19 outbreak & lockdown in India, which either focused on specific areas like  
74 perceived mental health care need [9] and effect of gender and marital status [10],  
75 or conducted on specific population like healthcare workers [11] and pharmacy  
76 students [12]. However, there are no studies conducted to assess the impact of  
77 COVID-19 outbreak & lockdown on the mental health status of the general  
78 population of India with emphasis on the risk factors and protective factors. Our  
79 study aims to assess the prevalence of affective components of mental health viz.  
80 depression, anxiety and stress along with identifying the high-risk group of  
81 population. We believe, our study would help the authorities and mental health  
82 professionals in strategizing and delivering mental healthcare to the population  
83 targeting on the high-risk group and help maintaining the psychosocial well-being of  
84 the Indian population.

## 85 **Methodology**

### 86 **Study design and participants**

87 The study was a cross sectional survey conducted through an online survey  
88 platform. The invite link to attend the survey was distributed in social networks like  
89 Facebook, WhatsApp and Telegram. Only adult (age above 18 years), Indian  
90 residents were invited. The objective of the study was explained, and the consented  
91 participants filled out the survey and could quit the survey as and when needed. The

92 entire survey was in English and a tentative average time duration needed to fill out  
93 the survey was mentioned beforehand (15-20 minutes). Ethical approval was  
94 obtained from Institutional Ethics Committee on Fasttrack basis and the anonymity of  
95 the participants was maintained.

## 96 **Survey development and Data collection**

97 The survey included a self-administered questionnaire which was developed after  
98 extensive literature survey and included questions pertaining to sociodemographic  
99 variables and COVID-19 outbreak & lockdown related variables. Snowball sampling  
100 method was used, and the data collected between May 5<sup>th</sup> to 14<sup>th</sup>, 2020 during the  
101 third phase of lockdown in India was taken for this study. The data collected were  
102 sociodemographic variables, COVID-19 outbreak & lockdown related variables and  
103 mental health status of the participants.

## 104 **Sociodemographic variables**

105 Sociodemographic variables included gender, age, educational status, employment  
106 status, marital status, monthly income, parental status and household size.

## 107 **COVID-19 outbreak & lockdown related variables**

108 COVID-19 outbreak & lockdown related variables included (a) practice of personal  
109 precautionary measures; wearing masks and gloves in public places, frequency of  
110 hand washing with soap or sanitizer per day, The participants were asked if they or  
111 any of their peers tested for COVID-19 (b) awareness and knowledge regarding  
112 COVID-19 pandemic; route of transmission, means of gathering information,  
113 frequency of checking for information and level of satisfaction of the attained  
114 information, (c) personal concerns regarding the outbreak; level of confidence in the

115 physician to diagnose COVID-19 infection, self-perceived likelihood of contracting  
116 COVID-19 and surviving if contracted with COVID-19 and concerns for family  
117 members to contract the infection.

## 118 **Psychological status of the participants**

119 Affective component of mental health of the participants viz depression, anxiety and  
120 stress were assessed using Lovibond and Lovibond's short version of the  
121 Depression Anxiety Stress Scale 21 (DASS21). DASS21 is a reliable instrument  
122 used in clinical and nonclinical samples which can measure and differentiate  
123 between the three negative emotional states [13, 14]. The sub-scores for depression,  
124 anxiety and stress were summed up and categorized into "normal", "mild",  
125 "moderate", "severe" and "extremely severe". Cut-off score of  $\geq 10$  for depression,  $\geq 8$   
126 for anxiety and  $\geq 15$  for stress were considered to be having the aforesaid disorders  
127 [15].

## 128 **Statistical analysis**

129 Analysis was performed using SPSS V.26.0, IBM, New York, USA. Descriptive  
130 analysis was performed for all variables. Depression, anxiety and stress scores were  
131 expressed as mean and SD. Multicollinearity was checked between independent  
132 variables and the variance inflation factor (VIF) was found to be less than 3.

133 To explore potential predictors for depression, anxiety and stress, binomial logistic  
134 regression analysis of each independent variable was performed separately, and the  
135 results were expressed as crude odds ratio (cOR) with 95% confidence interval (CI)  
136 and P value. This was followed by Multivariate binomial logistic regression analysis  
137 using 'stepwise forward LR' technique, which included independent variables which

138 were found to be significant ( $P < 0.25$ , Hosmer-Lemeshow recommendation) by  
139 univariate analysis. The regression analysis was performed in two blocks,  
140 sociodemographic variables block, and COVID-19 outbreak & lockdown related  
141 variables block. The latter block was explored after controlling for the significant  
142 sociodemographic factors. The results were expressed as Wald test value, adjusted  
143 odds ratio (aOR) with 95% confidence interval and P value ( $P < 0.05$  was considered  
144 statistically significant).

## 145 **Results and Discussion**

### 146 **Descriptive characteristics of the study population**

147 968 responses were received, out of which 64 responses were incomplete, 25  
148 respondents were underage, and 6 respondents were of a different nationality and  
149 were hence excluded. The final sample size was 873. We had an almost even  
150 participation from males (54.1%) and females (45.9%) and majority of the  
151 participants were of age group 18 to 45 years (85.1%) with the average age of  
152  $33.6 \pm 12.15$  years. The descriptive statistics of the study population is shown in Table  
153 1.

154 **Table 1: Descriptive statistics of the study population**

| <b>Variables</b>                  | <b>Subgroups</b> | <b>Number of participants</b> | <b>%</b> |
|-----------------------------------|------------------|-------------------------------|----------|
| <b>Sociodemographic variables</b> |                  |                               |          |
| Gender                            | Male             | 473                           | 54.1     |
|                                   | Female           | 400                           | 45.9     |
| Age (years)                       | 18 to 25         | 276                           | 31.6     |
|                                   | 26 to 35         | 225                           | 22.7     |

|                      |                         |     |       |
|----------------------|-------------------------|-----|-------|
|                      | 36 to 45                | 269 | 30.8  |
|                      | 46 to 55                | 40  | 4.5   |
|                      | 56 & above              | 63  | 7.2   |
| Educational status   | None                    | 28  | 3.2   |
|                      | Higher secondary school | 261 | 29.8  |
|                      | Bachelor's degree       | 413 | 47.3  |
|                      | Master's degree         | 147 | 16.8  |
|                      | Doctorate degree        | 24  | 2.7   |
| Marital status       | Single                  | 388 | 44.4  |
|                      | Married                 | 469 | 53.7  |
|                      | Widowed/ separated      | 16  | 1.9   |
| Employment status    | Student                 | 259 | 29.7  |
|                      | Employed – Government   | 80  | 9.2   |
|                      | Employed – private      | 309 | 35.4  |
|                      | Self-business           | 125 | 14.3  |
|                      | Unemployed              | 100 | 11.4  |
| Monthly income (INR) | 10,000 and less         | 307 | 35.1  |
|                      | 10,001-20,000           | 42  | 5.4   |
|                      | 20,001-30,000           | 31  | 3.5   |
|                      | 30,001-40,000           | 75  | 8.5   |
|                      | 40,001-50,000           | 59  | 6.7   |
|                      | 50,001-100,000          | 207 | 23.3  |
|                      | 100,000 & above         | 152 | 17.4  |
| Parental status      | No kid                  | 406 | 46.5  |
|                      | 1 kid                   | 141 | 16.1  |
|                      | 2 kids                  | 254 | 29.09 |
|                      | 3 or more kids          | 72  | 8.2   |
| Household size       | 1 member                | 12  | 1.3   |



|                                                                                          |                     |     |      |
|------------------------------------------------------------------------------------------|---------------------|-----|------|
|                                                                                          | 2 members           | 125 | 14.3 |
|                                                                                          | 3-6 members         | 708 | 81.2 |
|                                                                                          | More than 6 members | 28  | 3.2  |
| <b>Practice of personal precautionary measures during COVID-19 outbreak and lockdown</b> |                     |     |      |
| How often do you wear mask and gloves while being outside in public places?              | No                  | 103 | 11.8 |
|                                                                                          | Sometimes           | 109 | 12.4 |
|                                                                                          | Yes                 | 661 | 75.8 |
| How often do you wash your hands with soap or hand sanitizer per day?                    | less than 5 times   | 254 | 29.1 |
|                                                                                          | 5 to 10 times       | 308 | 35.2 |
|                                                                                          | 10 to 15 times      | 227 | 26.1 |
|                                                                                          | More than 15 times  | 84  | 9.6  |
| <b>Awareness and Knowledge about COVID-19 outbreak</b>                                   |                     |     |      |
| Route of transmission                                                                    |                     |     |      |
| Contact with infected person                                                             | No                  | 193 | 22.1 |
|                                                                                          | Yes                 | 680 | 77.9 |
| Droplets                                                                                 | No                  | 252 | 28.9 |
|                                                                                          | Yes                 | 621 | 71.1 |
| Airborne                                                                                 | No                  | 676 | 77.4 |
|                                                                                          | Yes                 | 197 | 22.6 |
| Contact with contaminated objects                                                        | No                  | 282 | 32.3 |
|                                                                                          | Yes                 | 591 | 67.7 |
| Through food and water                                                                   | No                  | 816 | 93.5 |
|                                                                                          | Yes                 | 57  | 6.5  |
| Pet animals                                                                              | No                  | 853 | 97.7 |
|                                                                                          | Yes                 | 20  | 2.3  |
| Are you aware of the                                                                     | Yes                 | 843 | 96.5 |

|                                                                                    |                      |     |      |
|------------------------------------------------------------------------------------|----------------------|-----|------|
| increase in number of COVID-19 cases in India?                                     | No                   | 30  | 3.5  |
| <b>Source of daily information regarding COVID-19 outbreak</b>                     |                      |     |      |
| Internet                                                                           | No                   | 227 | 26   |
|                                                                                    | Yes                  | 646 | 74   |
| TV                                                                                 | No                   | 164 | 18.8 |
|                                                                                    | Yes                  | 709 | 81.2 |
| Friends and relatives                                                              | No                   | 569 | 65.1 |
|                                                                                    | Yes                  | 304 | 34.9 |
| MOH messages                                                                       | No                   | 800 | 91.6 |
|                                                                                    | Yes                  | 73  | 8.4  |
| Radio                                                                              | No                   | 869 | 99.5 |
|                                                                                    | Yes                  | 4   | 0.5  |
| Other sources<br>(Newspaper, magazines<br>etc.)                                    | No                   | 821 | 94   |
|                                                                                    | Yes                  | 52  | 6    |
| Are you satisfied with the information received daily regarding COVID-19 outbreak? | Highly satisfied     | 47  | 5.4  |
|                                                                                    | Satisfied            | 575 | 65.9 |
|                                                                                    | Not satisfied        | 106 | 12.1 |
|                                                                                    | Highly not satisfied | 34  | 3.9  |
|                                                                                    | I don't know         | 111 | 12.7 |
| How often do you check for information about COVID 19 per day?                     | Less than 5 times    | 490 | 56.1 |
|                                                                                    | Less than 10 times   | 205 | 23.5 |
|                                                                                    | Less than 20 times   | 146 | 16.7 |
|                                                                                    | More than 21 times   | 32  | 3.7  |
| <b>Personal concerns regarding COVID-19 outbreak and lockdown</b>                  |                      |     |      |
| How confident are you on your physician to diagnose                                | Highly confident     | 110 | 12.6 |
|                                                                                    | Confident            | 528 | 60.5 |
|                                                                                    | Not confident        | 51  | 5.8  |

|                                                                                                      |                      |     |      |
|------------------------------------------------------------------------------------------------------|----------------------|-----|------|
| COVID-19 infection?                                                                                  | I don't know         | 184 | 21.1 |
| How likely are you to contract COVID-19 during this outbreak?                                        | Highly likely        | 16  | 1.8  |
|                                                                                                      | Likely               | 248 | 28.4 |
|                                                                                                      | Not likely           | 345 | 39.4 |
|                                                                                                      | Highly not likely    | 89  | 10.2 |
|                                                                                                      | I don't know         | 175 | 20   |
| How likely are you to survive, if contracted with COVID-19 infection?                                | Highly likely        | 129 | 14.8 |
|                                                                                                      | Likely               | 456 | 52.2 |
|                                                                                                      | Not likely           | 55  | 6.3  |
|                                                                                                      | Highly not likely    | 20  | 2.3  |
|                                                                                                      | I don't know         | 213 | 24.4 |
| How concerned are you about your family members to contract COVID-19 infection during this outbreak? | Highly concerned     | 566 | 64.8 |
|                                                                                                      | Concerned            | 276 | 31.6 |
|                                                                                                      | Not concerned        | 11  | 1.3  |
|                                                                                                      | Highly not concerned | 12  | 1.4  |
|                                                                                                      | I don't know         | 8   | 0.9  |

155 Average score for the three subscales were, depression:  $5.02 \pm 4.96$ , anxiety:  
 156  $4.41 \pm 3.41$  and stress:  $7.77 \pm 7.42$ . 18.56% had symptoms of depression with the  
 157 majority having mild depression (15.1%), 25.66% had symptoms of anxiety where,  
 158 participants with moderate anxiety predominated (16.3%) and 21.99% had  
 159 symptoms of stress with the maximum in mild stress category (14.5%) (Figure 1).  
 160 Our results were considerably higher than the prevalence of these negative  
 161 components of psychological health assessed by studies in the population, before  
 162 the pandemic [16, 17] while being similar to the findings by studies conducted in  
 163 other countries during COVID-19 pandemic [6, 8] and SARS pandemic [4].  
 164 Figure 1: Prevalence of Depression, Anxiety and Stress in the study population (in  
 165 %)

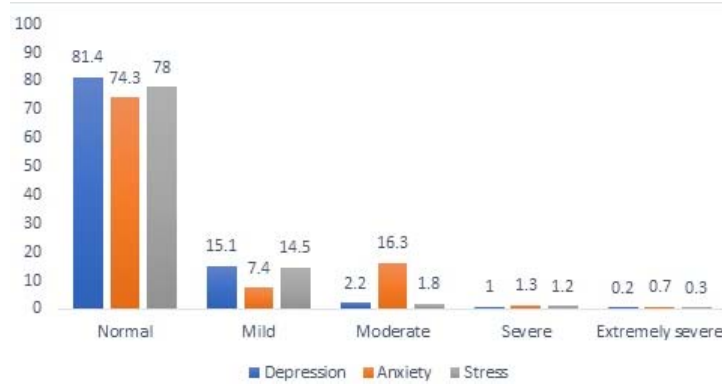

166

167 **Association between sociodemographic, COVID-19**  
 168 **outbreak & lockdown related variables and mental health**  
 169 **status**

170 Marital status, wearing masks and gloves in public places, awareness of increase in  
 171 number of COVID-19 cases, Satisfaction with the information received daily  
 172 regarding COVID-19 outbreak (Table 2 and 3) were excluded in the final model for  
 173 depression based on the initial binomial logistic regression.

174 Table 2: Bivariate analysis of sociodemographic variables by binary logistic  
 175 regression

| Independent variables | Depression |       |        |       | Anxiety |       |        |       | Stress |       |        |       |
|-----------------------|------------|-------|--------|-------|---------|-------|--------|-------|--------|-------|--------|-------|
|                       | P          |       | 95% CI |       | P       |       | 95% CI |       | P      |       | 95% CI |       |
|                       | val        | cOR   | Lower  | Upper | value   | cOR   | Lower  | upper | value  | cOR   | Lower  | upper |
| Gender                |            |       |        |       |         |       |        |       |        |       |        |       |
| Male*                 | -          | -     | -      | -     | -       | -     | -      | -     | -      | -     | -      | -     |
| Female                | .004       | 1.667 | 1.182  | 2.352 | .0004   | 2.624 | 1.917  | 3.593 | .0005  | 2.075 | 1.497  | 2.876 |

|                       |     |      |       |       |      |      |       |       |      |      |       |       |
|-----------------------|-----|------|-------|-------|------|------|-------|-------|------|------|-------|-------|
| Age (years)           | 0.0 |      |       |       | 0.00 |      |       |       | 0.00 |      |       |       |
|                       | 00  |      |       |       | 0    |      |       |       | 0    |      |       |       |
| 18 to 25*             | -   | -    | -     | -     | -    | -    | -     | -     | -    | -    | -     | -     |
| -26 to 35             | .00 | .456 | .268  | .776  | .006 | .526 | .332  | .833  | .006 | .465 | .270  | .801  |
|                       | 4   |      |       |       |      |      |       |       |      |      |       |       |
| 36 to 45              | .04 | 1.50 | 1.007 | 2.260 | .087 | 1.38 | .953  | 2.023 | .005 | 1.78 | 1.187 | 2.669 |
|                       | 6   | 9    |       |       |      | 9    |       |       |      | 0    |       |       |
| 46 to 55              | .79 | .893 | .374  | 2.128 | .008 | 2.50 | 1.267 | 4.942 | .000 | 5.52 | 2.759 | 11.06 |
|                       | 8   |      |       |       |      | 3    |       |       |      | 4    |       | 0     |
| 56 & above            | .36 | .701 | .326  | 1.509 | .159 | 1.52 | .847  | 2.762 | .002 | 2.59 | 1.430 | 4.723 |
|                       | 4   |      |       |       |      | 9    |       |       |      | 9    |       |       |
| Educational           | 0.0 |      |       |       | 0.00 |      |       |       | 0.00 |      |       |       |
| status                | 00  |      |       |       | 0    |      |       |       | 0    |      |       |       |
| None*                 | -   | -    | -     | -     | -    | -    | -     | -     | -    | -    | -     | -     |
| Higher                | .81 | 1.16 | .333  | 4.078 | .018 | .337 | .137  | .830  | .851 | .899 | .294  | 2.749 |
| secondary             | 2   | 4    |       |       |      |      |       |       |      |      |       |       |
| school                |     |      |       |       |      |      |       |       |      |      |       |       |
| Bachelor's            | .10 | 2.76 | .819  | 9.361 | .410 | 1.42 | .613  | 3.316 | .069 | 2.72 | .927  | 8.015 |
| degree                | 1   | 9    |       |       |      | 6    |       |       |      | 5    |       |       |
| Master's              | .67 | 1.31 | .362  | 4.753 | .106 | .464 | .182  | 1.179 | .766 | .837 | .260  | 2.691 |
| degree                | 9   | 2    |       |       |      |      |       |       |      |      |       |       |
| Doctorate             | .53 | 1.66 | .334  | 8.324 | .117 | 2.50 | .795  | 7.861 | .198 | 2.47 | .624  | 9.788 |
| degree                | 4   | 7    |       |       |      | 0    |       |       |      | 1    |       |       |
| Marital status        | 0.7 |      |       |       | 0.29 |      |       |       | 0.00 |      |       |       |
|                       | 17  |      |       |       | 8    |      |       |       | 5    |      |       |       |
| Single*               | -   | -    | -     | -     | -    | -    | -     | -     | -    | -    | -     | -     |
| Married               | .41 | .867 | .616  | 1.221 | .309 | .853 | .628  | 1.159 | .252 | 1.21 | .872  | 1.689 |
|                       | 5   |      |       |       |      |      |       |       |      | 3    |       |       |
| Widowed/<br>separated | .99 | .246 | .046  | .623  | .200 | .375 | .084  | 1.678 | .001 | 5.27 | 1.905 | 14.62 |
|                       | 8   |      |       |       |      |      |       |       |      | 8    |       | 4     |

|               |     |      |       |       |      |      |       |        |      |      |       |       |
|---------------|-----|------|-------|-------|------|------|-------|--------|------|------|-------|-------|
| Employment    | 0.0 |      |       |       | 0.00 |      |       |        | 0.00 |      |       |       |
| status        | 00  |      |       |       | 0    |      |       |        | 0    |      |       |       |
| Student*      | -   | -    | -     | -     | -    | -    | -     | -      | -    | -    | -     | -     |
| Employed -    | .07 | .373 | .128  | 1.090 | .540 | 1.24 | .621  | 2.482  | .997 | .042 | .009  | .103  |
| Government    | 1   |      |       |       |      | 2    |       |        |      |      |       |       |
| Employed –    | .03 | 1.63 | 1.027 | 2.616 | .001 | 2.12 | 1.368 | 3.297  | .003 | 1.96 | 1.252 | 3.097 |
| private       | 8   | 9    |       |       |      | 4    |       |        |      | 9    |       |       |
| Self-business | .00 | 2.86 | 1.680 | 4.902 | .000 | 4.26 | 2.575 | 7.069  | .000 | 3.85 | 2.298 | 6.457 |
|               | 0   | 9    |       |       |      | 7    |       |        |      | 2    |       |       |
| Unemployed    | .00 | 3.33 | 1.907 | 5.844 | .000 | 6.14 | 3.620 | 10.444 | .000 | 5.60 | 3.274 | 9.589 |
|               | 0   | 8    |       |       |      | 9    |       |        |      | 3    |       |       |
| Monthly       | 0.0 |      |       |       | 0.00 |      |       |        | 0.00 |      |       |       |
| income (INR)  | 00  |      |       |       | 4    |      |       |        | 3    |      |       |       |
| 10,000 and    | -   | -    | -     | -     | -    | -    | -     | -      | -    | -    | -     | -     |
| less          |     |      |       |       |      |      |       |        |      |      |       |       |
| 10,001-20,000 | .16 | .472 | .162  | 1.376 | .840 | 1.07 | .517  | 2.249  | .052 | .383 | .146  | 1.010 |
|               | 9   |      |       |       |      | 9    |       |        |      |      |       |       |
| 20,001-30,000 | .99 | .002 | .000  | .016  | .197 | 1.67 | .766  | 3.647  | .998 | .007 | .000  | .015  |
|               | 8   |      |       |       |      | 2    |       |        |      |      |       |       |
| 30,001-40,000 | .10 | 2.37 | 1.363 | 4.150 | .416 | 1.26 | .720  | 2.210  | .566 | 1.17 | .674  | 2.059 |
|               | 2   | 8    |       |       |      | 2    |       |        |      | 8    |       |       |
| 40,001-50,000 | .99 | .004 | .000  | .023  | .997 | .018 | .004  | .048   | .997 | .017 | .000  | .031  |
|               | 7   |      |       |       |      |      |       |        |      |      |       |       |
| 50,001-       | .00 | .052 | .358  | 1.099 | .203 | .800 | .228  | 1.640  | .187 | 1.29 | .881  | 1.916 |
| 100,000       | 1   |      |       |       |      |      |       |        |      | 9    |       |       |
| 100,000 &     | .00 | .350 | .177  | .689  | .042 | .657 | .402  | 1.072  | .002 | .430 | .252  | .734  |
| above         | 2   |      |       |       |      |      |       |        |      |      |       |       |
| Parental      | 0.0 |      |       |       | 0.00 |      |       |        | 0.00 |      |       |       |
| status        | 00  |      |       |       | 0    |      |       |        | 0    |      |       |       |

|                      |     |      |      |       |      |      |      |       |      |      |      |      |
|----------------------|-----|------|------|-------|------|------|------|-------|------|------|------|------|
| No kid               | .00 | .067 | .036 | .123  | .000 | .084 | .044 | .159  | .000 | .047 | .024 | .091 |
| 0                    |     |      |      |       |      |      |      |       |      |      |      |      |
| 1 kid                | .00 | .002 | .000 | .016  | .000 | .013 | .005 | .034  | .000 | .003 | .001 | .013 |
| 0                    |     |      |      |       |      |      |      |       |      |      |      |      |
| 2 kids               | .00 | .035 | .018 | .070  | .000 | .047 | .024 | .094  | .000 | .053 | .026 | .105 |
| 0                    |     |      |      |       |      |      |      |       |      |      |      |      |
| 3 or more kids*      | -   | -    | -    | -     | -    | -    | -    | -     | -    | -    | -    | -    |
| Household size       | 0.0 |      |      |       | 0.02 |      |      |       | 0.00 |      |      |      |
| 00                   |     |      |      |       | 6    |      |      |       | 0    |      |      |      |
| 1 member             | .76 | 1.25 | .292 | 5.348 | .722 | .773 | .187 | 3.196 | .999 | .005 | .000 | .015 |
| 4                    | 0   |      |      |       |      |      |      |       |      |      |      |      |
| 2 members            | .00 | .083 | .023 | .300  | .008 | .294 | .120 | .722  | .000 | .029 | .008 | .099 |
| 0                    |     |      |      |       |      |      |      |       |      |      |      |      |
| 3-6 members          | .31 | .649 | .280 | 1.504 | .147 | .563 | .259 | 1.223 | .001 | .280 | .131 | .601 |
| 4                    |     |      |      |       |      |      |      |       |      |      |      |      |
| More than 6 members* | -   | -    | -    | -     |      |      |      |       |      |      |      |      |

176 Abbreviations: cOR, crude odds ratio; 95% CI, 95% confidence interval; \* Reference  
177 group

178 Table 3: Bivariate analysis of COVID-19 outbreak & lockdown related variables using  
179 binary logistic regression

| Independent variables | Depression |        |     |                | Anxiety |        |     |                | Stress |        |     |
|-----------------------|------------|--------|-----|----------------|---------|--------|-----|----------------|--------|--------|-----|
|                       | P          | 95% CI |     |                | P       | 95% CI |     |                | P      | 95% CI |     |
|                       |            | value  | cOR | Lower<br>Upper |         | value  | cOR | Lower<br>Upper |        | value  | cOR |
|                       |            |        |     |                |         |        |     |                |        |        |     |

|                       |      |      |      |       |      |      |       |       |      |      |       |       |
|-----------------------|------|------|------|-------|------|------|-------|-------|------|------|-------|-------|
| <b>Wearing</b>        | 0.06 |      |      |       | 0.05 |      |       |       |      | 0.64 |       |       |
| <b>mask and</b>       | 6    |      |      |       | 4    |      |       |       |      | 8    |       |       |
| <b>gloves while</b>   |      |      |      |       |      |      |       |       |      |      |       |       |
| <b>being</b>          |      |      |      |       |      |      |       |       |      |      |       |       |
| <b>outside in</b>     |      |      |      |       |      |      |       |       |      |      |       |       |
| <b>public places</b>  |      |      |      |       |      |      |       |       |      |      |       |       |
| No*                   | -    | -    | -    | -     | -    | -    | -     | -     | -    | -    | -     | -     |
| Sometimes             | .571 | .794 | .358 | 1.763 | .017 | 2.18 | 1.152 | 4.127 | .518 | 1.24 | .637  | 2.447 |
| Yes                   | .176 | 1.49 | .836 | 2.663 | .121 | 1.51 | .896  | 2.574 | .352 | 1.28 | .757  | 2.186 |
|                       |      | 2    |      |       |      | 9    |       |       |      | 7    |       |       |
| <b>Frequency of</b>   | 0.00 |      |      |       | 0.00 |      |       |       |      | .000 |       |       |
| <b>washing</b>        | 0    |      |      |       | 0    |      |       |       |      |      |       |       |
| <b>hands with</b>     |      |      |      |       |      |      |       |       |      |      |       |       |
| <b>soap or hand</b>   |      |      |      |       |      |      |       |       |      |      |       |       |
| <b>sanitizer per</b>  |      |      |      |       |      |      |       |       |      |      |       |       |
| <b>day</b>            |      |      |      |       |      |      |       |       |      |      |       |       |
| Less than 5           | .000 | .091 | .052 | .161  | .000 | .108 | .062  | .188  | .000 | .084 | .047  | .149  |
| times                 |      |      |      |       |      |      |       |       |      |      |       |       |
| 5 to 10 times         | .000 | .040 | .022 | .074  | .000 | .117 | .068  | .200  | .000 | .054 | .030  | .098  |
| 10 to 15 times        | .000 | .101 | .057 | .179  | .000 | .166 | .096  | .287  | .000 | .139 | .080  | .242  |
| More than 15          |      |      |      |       |      |      |       |       |      |      |       |       |
| times*                | -    | -    | -    | -     | -    | -    | -     | -     | -    | -    | -     | -     |
| <b>Awareness</b>      |      |      |      |       |      |      |       |       |      |      |       |       |
| <b>of increase in</b> |      |      |      |       |      |      |       |       |      |      |       |       |
| <b>number of</b>      |      |      |      |       |      |      |       |       |      |      |       |       |
| <b>COVID-19</b>       |      |      |      |       |      |      |       |       |      |      |       |       |
| <b>cases</b>          |      |      |      |       |      |      |       |       |      |      |       |       |
| Yes                   | 0.99 | 3.42 | 1.80 | 4.30  | 0.74 | 0.59 | 0.041 | 1.023 | 0.52 | 2.51 | 0.962 | 2.985 |
|                       | 8    |      |      |       |      |      |       |       |      |      |       |       |



|                                                                        |      |      |       |       |      |      |       |       |      |      |       |       |
|------------------------------------------------------------------------|------|------|-------|-------|------|------|-------|-------|------|------|-------|-------|
| <b>No</b>                                                              | -    | -    | -     | -     | -    | -    | -     | -     | -    | -    | -     | -     |
| <b>Satisfaction</b>                                                    | .212 |      |       |       | .000 |      |       |       | .040 |      |       |       |
| <b>with the information received daily regarding COVID-19 outbreak</b> |      |      |       |       |      |      |       |       |      |      |       |       |
| Highly satisfied                                                       | .023 | .235 | .067  | .820  | .023 | .276 | .091  | .837  | .004 | .161 | .047  | .556  |
| Satisfied                                                              | .411 | .814 | .498  | 1.330 | .783 | .936 | .586  | 1.496 | .099 | .684 | .435  | 1.074 |
| Not satisfied                                                          | .229 | .657 | .332  | 1.302 | .159 | 1.52 | .847  | 2.743 | .064 | .550 | .291  | 1.037 |
|                                                                        |      |      |       |       |      | 4    |       |       |      |      |       |       |
| Highly not satisfied                                                   | .812 | .892 | .347  | 2.290 | .103 | 3.33 | 1.501 | 7.408 | .300 | .613 | .243  | 1.546 |
|                                                                        |      |      |       |       |      | 5    |       |       |      |      |       |       |
| I don't know                                                           | -    | -    | -     | -     | -    | -    | -     | -     | -    | -    | -     | -     |
| <b>Frequency of checking for information about COVID 19 per day</b>    | .000 |      |       |       | .000 |      |       |       | .000 |      |       |       |
| Less than 5 times                                                      | .043 | .419 | .180  | .974  | .759 | .879 | .384  | 2.010 | .243 | 2.05 | .613  | 6.909 |
|                                                                        |      |      |       |       |      |      |       |       |      | 8    |       |       |
| Less than 10 times                                                     | .121 | .494 | .203  | 1.205 | .517 | .750 | .314  | 1.791 | .361 | 1.78 | .514  | 6.223 |
|                                                                        |      |      |       |       |      |      |       |       |      | 8    |       |       |
| Less than 20 times                                                     | .046 | 2.40 | 1.014 | 5.713 | .054 | 2.34 | .987  | 5.557 | .000 | 9.15 | 2.669 | 31.37 |
|                                                                        |      | 7    |       |       |      | 1    |       |       |      | 1    |       | 6     |
| More than 21 times                                                     | -    | -    | -     | -     | -    | -    | -     | -     | -    | -    | -     | -     |

|                                                                        |      |      |       |        |      |      |       |       |      |      |       |       |
|------------------------------------------------------------------------|------|------|-------|--------|------|------|-------|-------|------|------|-------|-------|
| <b>Level of confidence on physician to diagnose COVID-19 infection</b> | .000 |      |       |        | .000 |      |       |       | .000 |      |       |       |
| Highly confident                                                       | .129 | 1.46 | .894  | 2.407  | .883 | 1.03 | .640  | 1.681 | .402 | 1.23 | .756  | 2.011 |
|                                                                        |      | 7    |       |        |      | 7    |       |       |      | 3    |       |       |
| Confident                                                              | .000 | .293 | .194  | .443   | .000 | .315 | .217  | .458  | .000 | .358 | .244  | .526  |
| Not confident                                                          | .002 | .143 | .043  | .478   | .808 | .924 | .487  | 1.752 | .001 | .120 | .036  | .401  |
| I don't know                                                           | -    | -    | -     | -      | -    | -    | -     | -     | -    | -    | -     | -     |
| <b>Likelihood of contracting COVID-19</b>                              | .000 |      |       |        | .000 |      |       |       | .000 |      |       |       |
| Highly likely                                                          | .007 | 4.65 | 1.526 | 14.168 | .001 | 6.29 | 2.157 | 18.35 | .022 | 3.37 | 1.191 | 9.564 |
|                                                                        |      | 0    |       |        |      | 2    |       | 1     |      | 5    |       |       |
| Likely                                                                 | .011 | 2.05 | 1.178 | 3.589  | .014 | 1.92 | 1.140 | 3.235 | .823 | 1.05 | .666  | 1.666 |
|                                                                        |      | 6    |       |        |      | 1    |       |       |      | 4    |       |       |
| Not likely                                                             | .334 | 1.31 | .755  | 2.285  | .000 | 2.56 | 1.574 | 4.190 | .014 | .559 | .351  | .889  |
|                                                                        |      | 4    |       |        |      | 8    |       |       |      |      |       |       |
| Highly not likely                                                      | .000 | 4.79 | 2.546 | 9.015  | .000 | 3.88 | 2.120 | 7.136 | .003 | 2.29 | 1.321 | 3.978 |
|                                                                        |      | 1    |       |        |      | 9    |       |       |      | 2    |       |       |
| I don't know                                                           | -    | -    | -     | -      | -    | -    | -     | -     | -    | -    | -     | -     |
| <b>Likelihood of surviving, if infected with COVID-19</b>              | .000 |      |       |        | .302 |      |       |       | .000 |      |       |       |
| Highly likely                                                          | .000 | .322 | .177  | .587   | .397 | .811 | .500  | 1.317 | .000 | .269 | .146  | .494  |
| Likely                                                                 | .000 | .413 | .280  | .608   | .029 | .668 | .465  | .959  | .001 | .538 | .373  | .774  |
| Not likely                                                             | .997 | .000 | .000  | .      | .549 | .817 | .422  | 1.581 | .997 | .000 | .000  | .     |

|                                                          |      |      |       |        |      |      |      |       |      |      |       |       |
|----------------------------------------------------------|------|------|-------|--------|------|------|------|-------|------|------|-------|-------|
| Highly not likely                                        | .031 | 2.78 | 1.100 | 7.039  | .998 | .000 | .000 | .     | .019 | 3.06 | 1.198 | 7.838 |
| I don't know                                             | -    | -    | -     | -      | -    | -    | -    | -     | -    | -    | -     | -     |
| <b>Level of concern on family members to be infected</b> | .000 |      |       |        | .001 |      |      |       | .000 |      |       |       |
| Highly concerned                                         | .080 | .286 | .071  | 1.161  | .196 | .398 | .098 | 1.609 | .107 | .316 | .078  | 1.282 |
| Concerned                                                | .316 | 2.66 | .391  | 18.166 | .554 | 1.75 | .275 | 11.15 | .554 | 1.75 | .275  | 11.15 |
| Not concerned                                            | .000 | .049 | .011  | .220   | .044 | .232 | .056 | .959  | .006 | .136 | .032  | .569  |
| Highly not concerned                                     | .057 | 11.0 | .928  | 130.32 | .999 | .000 | .000 | .     | .999 | .317 | .090  | .742  |
| I don't know                                             | -    | -    | -     | -      | -    | -    | -    | -     | -    | -    | -     | -     |

180 Abbreviations: cOR, crude odds ratio; 95% CI, 95% confidence interval; \* Reference  
 181 group  
 182 Multiple logistic regression model for depression using stepwise forward LR method  
 183 was statistically significant,  $\chi^2(52) = 594.77$ ,  $P < 0.000$ . The model explained 80.1%  
 184 (Nagelkerke  $R^2$ ) of the variance in depression and correctly classified 94.6% of  
 185 cases. Six variables were found to be significant predictors including female gender,  
 186 parental status, frequency of hand washing, level of satisfaction with the information  
 187 received daily, level of confidence on the physician and likelihood of contracting  
 188 COVID-19 (Table 4).

189 Table 4: Multiple logistic regression analysis for depression and its correlates

| Variables | Categorie | B | S.E. | Wald | P | aOR | 95% CI for aOR |
|-----------|-----------|---|------|------|---|-----|----------------|
|-----------|-----------|---|------|------|---|-----|----------------|

|                                                                       | s                   | value  |            |        |      |       | Lower | Upper  |
|-----------------------------------------------------------------------|---------------------|--------|------------|--------|------|-------|-------|--------|
| <b>Gender</b>                                                         | Male*               | -      | -          | -      | -    | -     | -     | -      |
|                                                                       | Female              | 1.367  | .545       | 6.300  | .012 | 3.924 | 1.349 | 11.412 |
| <b>Parental status</b>                                                |                     |        |            | 12.381 | .006 |       |       |        |
|                                                                       | No kid              | 2.805  | 4.960      | .320   | .572 | 6.529 | .001  | 30.392 |
|                                                                       | One kid             | -5.463 | 44.34<br>1 | .008   | .930 | 0.396 | .053  | .461   |
|                                                                       | Two kids            | -1.572 | 3.955      | 4.698  | .030 | 0.189 | .051  | 0.440  |
|                                                                       | Three or more kids* | -      | -          | -      | -    | -     | -     | -      |
| <b>Frequency of washing hands with soap or hand sanitizer per day</b> |                     |        |            | 10.139 | .017 |       |       |        |
|                                                                       | Less than 5 times   | -1.265 | .725       | 3.047  | .081 | .282  | .068  | 1.168  |
|                                                                       | 5 to 10 times       | -1.877 | .644       | 8.498  | .004 | .153  | .043  | .541   |
|                                                                       | 10 to 15 times      | -1.615 | .753       | 4.593  | .032 | .199  | .045  | .871   |
|                                                                       | More than 15 times* | -      | -          | -      | -    | -     | -     | -      |
| <b>Satisfaction with the information received daily</b>               |                     |        |            | 20.434 | .000 |       |       |        |
|                                                                       | Highly satisfied    | -3.608 | 3.813      | .895   | .344 | .127  | .089  | 17.758 |
|                                                                       | Satisfied           | -8.529 | 1.916      | 19.818 | .000 | .405  | .159  | .740   |

|                                                                        |                      |        |       |        |      |       |      |       |
|------------------------------------------------------------------------|----------------------|--------|-------|--------|------|-------|------|-------|
| <b>regarding<br/>COVID-19<br/>outbreak</b>                             | Not satisfied        | -2.440 | 1.594 | 2.342  | .126 | .087  | .004 | 1.984 |
|                                                                        | Highly not satisfied | 4.762  | 9.993 | .000   | .998 | .599  | .000 | 2.105 |
|                                                                        | I don't know         | -      | -     | -      | -    | -     | -    | -     |
| <b>Level of confidence on physician to diagnose COVID-19 infection</b> |                      |        |       | 18.363 | .000 |       |      |       |
|                                                                        | Highly confident     | .692   | .544  | 1.619  | .203 | 1.998 | .688 | 5.807 |
|                                                                        | Confident            | -1.116 | .466  | 5.738  | .017 | .328  | .132 | .816  |
|                                                                        | Not confident        | -.292  | .971  | .090   | .764 | .747  | .111 | 5.006 |
|                                                                        | I don't know         | -      | -     | -      | -    | -     | -    | -     |
| <b>Likelihood of contracting COVID-19</b>                              |                      |        |       | 15.302 | .004 |       |      |       |
|                                                                        | Highly likely        | -.121  | .902  | .018   | .893 | .886  | .151 | 5.193 |
|                                                                        | Likely               | -.988  | .562  | 3.096  | .078 | .372  | .124 | 1.119 |
|                                                                        | Not likely           | -.097  | .503  | 5.782  | .016 | .151  | .021 | .294  |
|                                                                        | Highly not likely    | -1.504 | .626  | .037   | .847 | .907  | .338 | 2.432 |
|                                                                        | I don't know*        | -      | -     | -      | -    | -     | -    | -     |

190 Abbreviations: aOR, adjusted odds ratio; 95% CI, 95% confidence interval; B,  
 191 unstandardized beta coefficient; S.E, standard error of the coefficient; \* Reference  
 192 group

193 According to bivariate logistic regression analysis, among the sociodemographic  
 194 variables, marital status (Table 2) and among COVID-19 outbreak & lockdown  
 195 related factors, wearing masks and gloves in public places, awareness of increase in  
 196 number of COVID-19 cases, Likelihood of surviving, if infected with COVID-19 (Table  
 197 3) were excluded from the final model for anxiety.

198 The multiple logistic regression model for anxiety using stepwise forward LR method  
 199 showed significant goodness of fit to our observed data,  $\chi^2(48) = 455.7$ ,  $P < 0.000$ .  
 200 The model explained 59.8% (Nagelkerke  $R^2$ ) of the variance in anxiety and correctly  
 201 classified 86.8% of cases. The significant predictors for anxiety were found to be  
 202 female gender, educational status, employment status, frequency of checking for  
 203 information regarding COVID-19, level of confidence on the physician and likelihood  
 204 of contracting COVID-19 (Table 5).

205 Table 5: Multiple logistic regression analysis for anxiety and its correlates

| Variables                 | Categories              | B      | S.E.  | Wald   | P value | aOR   | 95% CI for aOR |       |
|---------------------------|-------------------------|--------|-------|--------|---------|-------|----------------|-------|
|                           |                         |        |       |        |         |       | Lower          | Upper |
| <b>Gender</b>             | Male*                   | -      | -     | -      | -       | -     | -              | -     |
|                           | Female                  | 1.248  | .266  | 21.947 | .000    | 3.483 | 2.066          | 5.870 |
| <b>Educational status</b> |                         |        |       | 14.839 | .005    |       |                |       |
|                           | None*                   | -      | -     | -      | -       | -     | -              | -     |
|                           | Higher secondary school | -2.069 | 1.104 | 3.516  | .061    | .126  | .015           | 1.098 |
|                           | Bachelor's degree       | -.883  | .971  | .826   | .363    | .414  | .062           | 2.775 |

|                                                                     |                     |       |       |        |       |       |       |        |
|---------------------------------------------------------------------|---------------------|-------|-------|--------|-------|-------|-------|--------|
|                                                                     | Master's degree     | -     | 1.014 | 4.795  | .029  | .108  | .015  | .592   |
|                                                                     | 2.221               |       |       |        |       |       |       |        |
|                                                                     | Doctorate degree    | .025  | 1.239 | .000   | .984  | 1.026 | .090  | 11.626 |
| <hr/>                                                               |                     |       |       |        |       |       |       |        |
| <b>Employment status</b>                                            |                     |       |       | 11.472 | 0.022 |       |       |        |
|                                                                     | Student*            | -     | -     | -      | -     | -     | -     | -      |
|                                                                     | Employed Government | -     | 1.045 | .798   | 1.717 | .190  | 2.845 | .596   |
|                                                                     | 13.584              |       |       |        |       |       |       |        |
|                                                                     | Employed – private  | -     | 1.324 | .601   | 4.856 | .028  | 3.757 | 1.158  |
|                                                                     | 12.191              |       |       |        |       |       |       |        |
|                                                                     | Self-business       | 1.440 | .696  | 4.281  | .039  | 4.222 | 1.079 | 16.523 |
|                                                                     | Unemployed          | 1.674 | .498  | 11.293 | .001  | 5.335 | 2.009 | 14.164 |
| <hr/>                                                               |                     |       |       |        |       |       |       |        |
| <b>Frequency of checking for information about COVID 19 per day</b> |                     |       |       | 9.651  | .022  |       |       |        |
|                                                                     | Less than 5 times   | -.892 | .847  | 1.109  | .029  | .410  | .078  | .657   |
|                                                                     | 10 times            | -.167 | .740  | .051   | .821  | .846  | .198  | 3.607  |
|                                                                     | 20 times            | .875  | .939  | .869   | .351  | 2.400 | .381  | 15.121 |
|                                                                     | More than 21 times* | -     | -     | -      | -     | -     | -     | -      |
| <hr/>                                                               |                     |       |       |        |       |       |       |        |
| <b>Level of</b>                                                     |                     |       |       | 12.598 | .006  |       |       |        |

|                     |               |       |      |        |      |       |       |        |
|---------------------|---------------|-------|------|--------|------|-------|-------|--------|
| <b>confidence</b>   | Highly        | .169  | .613 | .076   | .782 | 1.185 | .356  | 3.942  |
| <b>on</b>           | confident     |       |      |        |      |       |       |        |
| <b>physician to</b> |               | -     | .520 | 5.503  | .019 | .295  | .107  | .818   |
| <b>diagnose</b>     | Confident     | 1.220 |      |        |      |       |       |        |
| <b>COVID-19</b>     | Not           | .389  | .946 | .169   | .681 | 1.475 | .231  | 9.418  |
| <b>infection</b>    | confident     |       |      |        |      |       |       |        |
|                     | I don't       | -     | -    | -      | -    | -     | -     | -      |
|                     | know*         |       |      |        |      |       |       |        |
| <b>Likelihood</b>   |               |       |      | 19.332 | .001 |       |       |        |
| <b>of</b>           | Highly likely | .672  | .964 | .486   | .486 | 1.959 | .296  | 12.965 |
| <b>contracting</b>  | Likely        | -.970 | .563 | 2.976  | .085 | .379  | .126  | 1.141  |
| <b>COVID-19</b>     | Not likely    | -.023 | .515 | 1.002  | .014 | .777  | .356  | .981   |
|                     | Highly not    | 1.887 | .634 | 8.867  | .403 | 6.599 | 1.906 | 22.850 |
|                     | likely        |       |      |        |      |       |       |        |
|                     | I don't       | -     | -    | -      | -    | -     | -     | -      |
|                     | know*         |       |      |        |      |       |       |        |

206 Abbreviations: aOR, adjusted odds ratio; 95% CI, 95% confidence interval; B,  
 207 unstandardized beta coefficient; S.E, standard error of the coefficient; \* Reference  
 208 group

209 Wearing masks and gloves in public places, awareness of increase in number of  
 210 COVID-19 cases were excluded from the final model for stress based on bivariate  
 211 logistic regression analysis (Table 3). The multiple logistic regression model for  
 212 stress using stepwise forward LR method showed significant goodness of fit to our  
 213 observed data,  $\chi^2(54) = 621.77$ ,  $P < 0.000$ . The model explained 78.2% (Nagelkerke  
 214  $R^2$ ) of the variance in stress and correctly classified 92.1% of cases. Five variables  
 215 were found to be significant predictors including age of the participants, marital



216 status, household size, level of confidence on the physician and likelihood of  
 217 contracting COVID-19 (Table 6).

218 Table 6: Multiple logistic regression analysis for stress and its correlates

| Variables             | Categories            | B      | S.E.  | Wald   | P value | aOR    | 95% CI for aOR |        |
|-----------------------|-----------------------|--------|-------|--------|---------|--------|----------------|--------|
|                       |                       |        |       |        |         |        | Lower          | Upper  |
| <b>Age (years)</b>    |                       |        |       | 14.055 | .007    |        |                |        |
|                       | 18 to 25*             | -      | -     | -      | -       | -      | -              | -      |
|                       | 26 to 35              | -3.543 | 2.130 | 2.766  | .096    | .029   | .000           | 1.882  |
|                       | 36 to 45              | -5.531 | 2.290 | 5.832  | .016    | .14    | .102           | .353   |
|                       | 46 to 55              | -4.912 | 1.832 | 7.190  | .007    | .17    | .094           | .267   |
|                       | 56 & above            | -.526  | 2.557 | .042   | .837    | .591   | .004           | 18.803 |
| <b>Marital status</b> |                       |        |       | 19.503 | .000    |        |                |        |
|                       | Single*               | -      | -     | -      | -       | -      | -              | -      |
|                       | Married               | 7.753  | 1.756 | 19.493 | .000    | 2.502  | 1.701          | 8.924  |
|                       | Widowed/<br>separated | 5.100  | 1.931 | 6.974  | .008    | 10.411 | 1.037          | 14.566 |
| <b>Household size</b> |                       |        |       | 18.370 | .000    |        |                |        |
|                       | 1 member              | -1.996 | .927  | 4.634  | .031    | .136   | .022           | .836   |
|                       | 2 members             | -5.705 | 1.104 | 26.699 | .000    | .213   | .100           | .429   |
|                       | 3-6<br>members        | -2.954 | .818  | 13.036 | .000    | .352   | .181           | .559   |

|                                                                        |                   |        |       |        |      |       |       |         |
|------------------------------------------------------------------------|-------------------|--------|-------|--------|------|-------|-------|---------|
|                                                                        | More than         |        |       |        |      |       |       |         |
|                                                                        | 6                 | -      | -     | -      | -    | -     | -     | -       |
|                                                                        | members*          |        |       |        |      |       |       |         |
| <b>Level of confidence on physician to diagnose COVID-19 infection</b> |                   |        |       | 16.540 | .001 |       |       |         |
|                                                                        | Highly confident  | 2.610  | 1.174 | 4.947  | .126 | 3.603 | 1.363 | 135.729 |
|                                                                        | Confident         | -5.012 | 1.648 | 9.251  | .002 | .807  | .450  | .968    |
|                                                                        | Not confident     | -6.395 | 2.517 | 6.456  | .011 | .002  | .001  | .232    |
|                                                                        | I don't know*     | -      | -     | -      | -    | -     | -     | -       |
| <b>Likelihood of contracting COVID-19</b>                              |                   |        |       | 22.887 | .000 |       |       |         |
|                                                                        | Highly likely     | -1.308 | .949  | 1.899  | .168 | .270  | .042  | 1.737   |
|                                                                        | Likely            | 2.161  | .754  | 8.220  | .004 | 1.115 | 1.026 | 1.505   |
|                                                                        | Not likely        | -5.219 | 1.102 | 22.441 | .000 | .005  | .001  | .047    |
|                                                                        | Highly not likely | -2.510 | 1.634 | 2.359  | .125 | .081  | .003  | 2.000   |
|                                                                        | I don't know*     | -      | -     | -      | -    | -     | -     | -       |

219 Abbreviations: aOR, adjusted odds ratio; 95% CI, 95% confidence interval; B,  
 220 unstandardized beta coefficient; S.E, standard error of the coefficient; \* Reference  
 221 group

222 We found that, females were 1.7 times more likely to be present with depressive  
 223 symptoms (cOR-1.667), 2.6 times as likely to show symptoms of anxiety (cOR-  
 224 2.624) and twice as likely to show stress symptoms (cOR-2.075) when compared to  
 225 males but when adjusted for other confounding factors, females were quadruple

226 times as likely as males to have depression (aOR-3.924) and 3.5 times as likely as  
227 males to have anxiety (aOR-3.483). Our results are similar to previous studies  
228 conducted during SARS and COVID-19 pandemic in Italy and China, where the  
229 prevalence of psychological disorders were steadily associated with the female  
230 gender [4, 6, 8]. This trend was noted in India before the outbreak too where the  
231 prevalence in depression and anxiety disorders were more in females than males  
232 [18]. There was no significant association between gender and likelihood of stress  
233 which is in accordance with studies conducted during earlier epidemic/pandemic  
234 situations [5, 19]. Gender specific help and counselling should be offered to mitigate  
235 the psychological strain in the population.

236 An interesting finding in our study was the variation in association between age and  
237 depression, anxiety and stress. Age of the participants was significantly associated  
238 with all three domains, where adult Indians of age 36 to 45 years were 1.5 times  
239 more likely to have depression (cOR-1.509) and individuals of 46 to 55 years of age  
240 were 2.5 times as likely to have anxiety (cOR-2.503) when compared to young adults  
241 of age 18 to 25 years. There was also an increase in likelihood of stress with  
242 increase in age (36 to 45 years-cOR-1.708, 46 to 55 years-cOR-5.524) with slight  
243 decrease in higher risk of stress in age above 55 years (cOR-2.599). However, when  
244 controlled for other factors, individuals above 25 years of age were found to be less  
245 likely to exhibit symptoms of stress when compared to younger adults of age below  
246 25 years (Table 6). This finding is similar to studies conducted in similar situations  
247 where younger age was found to associated with increased likelihood of stress and  
248 psychological distress[5, 6]. Young adults may have trouble coping with drastic  
249 societal changes and are more active in social media which is swarming with

250 rumours, which may induce fear, anxiety and other psychological effects. Special  
251 focus in identifying and providing mental health help for this age group is imperative.

252 With increase in level of educational status there was lower likelihood of anxiety but  
253 not depression and stress. Those with higher educational qualification were found to  
254 be less likely to show anxiety symptoms when compared to those who had none  
255 (higher secondary school - cOR-0.337, master's degree - aOR-0.108). Our finding is  
256 similar to the studies conducted both before and in relation to pandemic/epidemic [4,  
257 8, 18, 20]. Educational status influences the occupation and income of the individual,  
258 which are in turn associated with psychosocial wellbeing. The economic crisis due to  
259 lockdown, might put the individuals without formal education at higher risk of  
260 developing anxiety. Counselling, guidance or any form of mental health help should  
261 include verbal or pictorial representations to aid this group of population.

262 Marital status was significantly associated with stress and not with depression and  
263 anxiety. Married individuals were 2.5 times as likely (aOR-2.502) and  
264 widowed/separated individuals were 10 times as likely as single ones (aOR-10.411)  
265 to have stress symptoms. This is in contrary to the studies conducted in China, Iran  
266 and Italy during COVID-19 pandemic, where there was no association between  
267 marital status and negative mental status[6-8]. However, in India, being married was  
268 found to be strongly associated (6 times as likely as single individuals) with increase  
269 in the prevalence of mental health disorders in women unlike other neighbouring  
270 countries like China and other high resourced countries [21]. Negative psychological  
271 effects were observed in separated and widowed individuals [22]. This trend seems  
272 to be continuing during COVID-19 quarantine as well which is evident from our  
273 results. Married, separated/widowed individuals should be given additional help in  
274 combating psychological distress during this pandemic.

275 Employment status was significantly associated with depression, anxiety and stress  
276 where being unemployed and employed as self or in private sector were found to  
277 have higher risk of negative mental health when compared to student status. When  
278 adjusted for other confounders, unemployed individual were 5 times as likely (aOR-  
279 5.335) followed by individuals in self business who were 4 times as likely (aOR-  
280 4.222) and private sector employees who were 3.75 times (aOR-3.757) as likely to  
281 have anxiety symptoms. This is in contrary to the findings by Wang et al., who found  
282 that the student population suffered from higher levels of depression, anxiety and  
283 stress during COVID-19 pandemic in China[8]. Uncertainties regarding job security  
284 especially in self business and private sector along with the financial strain posed by  
285 the quarantine could be the cause for high prevalence of anxiety in the said  
286 population.

287 Monthly income was significantly associated with depression, anxiety and stress,  
288 where higher income was found to be protective against negative mental health  
289 components. Individuals with monthly income above 100,000INR was less likely to  
290 have depression (cOR-0.350) and stress (cOR-0.430) when compared to individuals  
291 with income less than 10,000INR per month. This is in accordance with previous  
292 studies in India where there was an inverse relation between income and common  
293 mental disorders [23]. However, when adjusted for the effects of confounders, there  
294 was no independent association between monthly income and depression, anxiety  
295 and stress. The relative financial stability in the high-income population could be the  
296 factor for relatively lesser psychological distress in the said population.

297 Having two kids posed lesser risk of depression when compared to having 3 or more  
298 kids (aOR-0.189), while there was no significant association with anxiety and stress.  
299 However, in bivariate analysis, not having kids and having 1 or 2 kids were found to

300 be protective against depression and anxiety and having one kid or none were found  
301 to be protective against stress when compared to having 3 or more children (Table  
302 2). There are varied reports regarding association between parental status and  
303 psychological distress. Not having kids was associated with depression during  
304 COVID-19 pandemic in Italy [6], having three or more kids were associated with  
305 lesser risk of psychological distress during equine influenza epidemic in Australia [5]  
306 and having kids was not associated with depression during SARS quarantine in  
307 Canada [4]. With the kids being home-schooled, burden on the parents have  
308 increased and could be a cause for increase in psychological distress which may  
309 increase with the number of kids.

310 Household size of two members was found to be protective against depression and  
311 anxiety and household size of 2 members, 3 to 6 members were protective against  
312 stress when compared to bigger household size. When controlled for confounders,  
313 individuals from smaller family size viz. one member (aOR-0.136), 2 members (aOR-  
314 0.213) and 3 to 6 members (aOR-0.352) were found to be less likely to have  
315 symptoms of stress when compared to individuals from family size of more than 6  
316 members. This is in contrary to a previous study in China where there was no  
317 association between household size and psychological distress [8, 24]. Lack of  
318 personal space and higher financial strain in larger families could be the possible  
319 reasons behind our results. Household size should be taken into consideration by  
320 the mental health professionals while offering guidance and counselling.

321 In our study, practice of specific precautionary measures like frequency of washing  
322 hands was found to be significantly related to depression, anxiety and stress while  
323 wearing masks and gloves in public places had no association when not controlled  
324 for confounders. In the final regression model however, lesser frequency of washing

325 hands (less than 15 times) was associated with lesser likelihood of anxiety (Table 5).  
326 Previously, anxiety was associated with increase in practice of preventive measures  
327 during SARS outbreak [25]. In a survey conducted during 2020 March 22<sup>nd</sup> -24<sup>th</sup> in  
328 India, 75% of the respondents were found to use gloves and sanitizers, whereas in  
329 our study, the number of individuals who do not wear masks and gloves in public  
330 places was 11.8% which is higher when compared to China (3.2%) [8, 9]. In our  
331 study, 28.9%, 22.1% and 32.3% of participants were not aware that droplets, contact  
332 with infected persons and contact with contaminated objects are possible routes of  
333 transmission of COVID-19 respectively (Table 1). This lack of awareness could be  
334 related to the laxity in practicing personal precautionary measures.

335 Those who checked for information less frequently (<5 times/day) about COVID-19  
336 were found to be less likely to show symptoms of anxiety when compared to those  
337 who checked for more than 21 times a day (aOR-0.410). 74% of the respondents  
338 gathered information about the pandemic through internet including social media  
339 which gives many inconsistent and fake news which may cause fear and anxiety.  
340 Individuals who were satisfied with the information received were found to be less  
341 likely to show depression symptoms (aOR-0.405) which was similar to the findings in  
342 China [8]. The population should be urged to follow authentic news provided by  
343 reliable sources to avoid psychological distress.

344 Those who felt confident on the physician's ability to diagnose COVID-19 infection  
345 were found to be less likely to have symptoms of depression (aOR-0.328), anxiety  
346 (aOR-0.295) and stress (aOR-0.807), similar to the study in China [24]. The  
347 confidence in physician's ability gives a sense of security to the individuals and  
348 hence reduces fear and psychological distress.

349 Individuals who expressed that they were not likely to contract COVID-19 during this  
350 outbreak were less likely to have symptoms of depression (aOR-0.151), anxiety  
351 (aOR-0.777) and those who thought they were likely to contract COVID-19 were  
352 more likely to have symptoms of stress (aOR-1.115). Similarly, the participants who  
353 thought that it was highly not likely for them to survive if infected were found to be  
354 more likely to have depression (cOR-2.783) and stress symptoms (cOR-3.064) while  
355 those who thought it was likely for them to survive had lower levels of anxiety (cOR-  
356 0.668) and stress (cOR-0.538). We also found that individuals who were not  
357 concerned about their family members contracting COVID-19 were less likely to  
358 show symptoms of depression (cOR-0.049), anxiety (cOR-0.232, 95% CI 0.056-  
359 0.959) and stress (cOR-0.136). Our findings are similar to previous studies where  
360 low levels of perceived likelihood of contracting COVID-19 and surviving the  
361 pandemic if infected were protective against depression, anxiety and stress [24].  
362 These concerns should be considered by the mental health workers when providing  
363 mental health help for the population.

## 364 **Limitations**

365 Our study is limited by the cross-sectional nature and the non-availability of control  
366 group. The longitudinal effects of the pandemic and lockdown is not ascertained. The  
367 study participants included only those who had access to internet and those who  
368 could respond in English. None of our participants were tested positive for COVID-19  
369 and neither had any contact history with known COVID-19 patients. Thus, our  
370 findings may not be generalised to the COVID-19 infected patients and their peers.



## 371 **Conclusion**

372 To our knowledge, our study is the first to assess the mental health status of the  
373 adult Indian population during COVID-19 outbreak & lockdown along with identifying  
374 the possible risk and protective factors. During the third phase of the lock down, less  
375 than one fifth of the adult Indian population suffered from depression, one fourth  
376 suffered from anxiety and more than one fifth suffered from stress. Females were  
377 more likely to suffer from depression and anxiety when compared to males.  
378 Employment in the government sector and higher educational status were protective  
379 against anxiety. Age above 25 years, smaller household size and single status were  
380 associated with decrease levels of stress. Parents with lesser number of kids ( $\leq 2$ ) or  
381 none were less likely to suffer from depression when compared to parents with more  
382 than 2 kids. Increased levels of confidence in physician's ability to diagnose COVID-  
383 19 infection, decreased self-perceived likelihood of contracting the infection were  
384 associated with decreased levels of depression, anxiety and stress. Less frequency  
385 of checking for information on COVID-19 was associated with decreased levels of  
386 anxiety and satisfaction of information received about COVID-19 pandemic was  
387 associated with decreased levels of depression.

388 The ripple caused by the COVID-19 outbreak & lockdown will be continuing far into  
389 the future and providing mental health support to the population, targeting the  
390 vulnerable groups is crucial. Our study provides an expansive assessment of risk  
391 and protective factors affecting the mental health of the population, which would help  
392 to design strategies and interventional methods to address and mitigate the negative  
393 impact of COVID-19 outbreak & lockdown on the mental health of the population and  
394 help prevent the same.

## 395 Acknowledgement:

396 The authors would like to thank all the participants in this study. The authors would  
397 like to thank the Deanship of Scientific Research, Majmaah University for the support  
398 of this project.

## 399 References

- 400 1. WHO. Rolling updates on coronavirus disease (COVID-19) Geneva2020 [updated 25th May  
401 2020. Available from: [https://www.who.int/emergencies/diseases/novel-coronavirus-2019/events-](https://www.who.int/emergencies/diseases/novel-coronavirus-2019/events-as-they-happen)  
402 [as-they-happen](https://www.who.int/emergencies/diseases/novel-coronavirus-2019/events-as-they-happen).
- 403 2. Press TC. Asia Today: India sees 10,000 new cases ahead of reopenings [e paper]. New Delhi:  
404 The Canadian Press; 2020 [updated 7th June 2020]. Available from:  
405 <https://ca.finance.yahoo.com/news/asia-today-india-reports-10-071148089.html>.
- 406 3. WHO. Modes of transmission of virus causing COVID-19:  
407 implications for IPC precaution recommendations Scientific brief. Geneva, control C-iap; 2020 29  
408 March 2020.
- 409 4. Hawryluck L, Gold WL, Robinson S, Pogorski S, Galea S, Styra R. SARS control and  
410 psychological effects of quarantine, Toronto, Canada. *Emerging Infectious Diseases*.  
411 2004;10(7):1206.
- 412 5. Taylor MR, Agho KE, Stevens GJ, Raphael B. Factors influencing psychological distress during  
413 a disease epidemic: data from Australia's first outbreak of equine influenza. *BMC Public Health*.  
414 2008;8:347.
- 415 6. Mazza C, Ricci E, Biondi S, Colasanti M, Ferracuti S, Napoli C, et al. A Nationwide Survey of  
416 Psychological Distress among Italian People during the COVID-19 Pandemic: Immediate  
417 Psychological Responses and Associated Factors. *International Journal of Environmental Research*  
418 *and Public Health*. 2020;17(9):3165.
- 419 7. Moghanibashi-Mansourieh A. Assessing the anxiety level of Iranian general population  
420 during COVID-19 outbreak. *Asian J Psychiatr*. 2020;51:102076.
- 421 8. Wang C, Pan R, Wan X, Tan Y, Xu L, Ho CS, et al. Immediate psychological responses and  
422 associated factors during the initial stage of the 2019 coronavirus disease (COVID-19) epidemic  
423 among the general population in China. *International journal of environmental research and public*  
424 *health*. 2020;17(5):1729.
- 425 9. Roy D, Tripathy S, Kar SK, Sharma N, Verma SK, Kaushal V. Study of knowledge, attitude,  
426 anxiety & perceived mental healthcare need in Indian population during COVID-19 pandemic. *Asian*  
427 *journal of psychiatry*. 2020;51:102083-.
- 428 10. Suseela V. Psychological Issues Based on Gender and Marital Status During Covid-19  
429 Lockdown Period. *Tathapi with ISSN 2320-0693 is an UGC CARE Journal*. 2020;19(8):755-64.
- 430 11. Chew NW, Lee GK, Tan BY, Jing M, Goh Y, Ngiam NJ, et al. A multinational, multicentre study  
431 on the psychological outcomes and associated physical symptoms amongst healthcare workers  
432 during COVID-19 outbreak. *Brain, behavior, and immunity*. 2020.
- 433 12. Suryadevara V, Adusumalli C, Adusumilli PK, Chalasani SH, Radhakrishnan R. Mental Health  
434 Status among the South Indian Pharmacy Students during Covid-19 Pandemic Quarantine Period: A  
435 Cross-Sectional Study. *medRxiv*. 2020.

- 436 13. Bottesi G, Ghisi M, Altoè G, Conforti E, Melli G, Sica C. The Italian version of the Depression  
437 Anxiety Stress Scales-21: Factor structure and psychometric properties on community and clinical  
438 samples. *Comprehensive psychiatry*. 2015;60:170-81.
- 439 14. Henry JD, Crawford JR. The short-form version of the Depression Anxiety Stress Scales  
440 (DASS-21): Construct validity and normative data in a large non-clinical sample. *British journal of*  
441 *clinical psychology*. 2005;44(2):227-39.
- 442 15. Lovibond PF, Lovibond SH. The structure of negative emotional states: Comparison of the  
443 Depression Anxiety Stress Scales (DASS) with the Beck Depression and Anxiety Inventories.  
444 *Behaviour research and therapy*. 1995;33(3):335-43.
- 445 16. Charlson FJ, Baxter AJ, Cheng HG, Shidhaye R, Whiteford HA. The burden of mental,  
446 neurological, and substance use disorders in China and India: a systematic analysis of community  
447 representative epidemiological studies. *The Lancet*. 2016;388(10042):376-89.
- 448 17. Pradeep BS, Gururaj G, Varghese M, Benegal V, Rao GN, Sukumar GM, et al. National mental  
449 health survey of India, 2016-rationale, design and methods. *PLoS One*. 2018;13(10):e0205096.
- 450 18. Sagar R, Dandona R, Gururaj G, Dhaliwal R, Singh A, Ferrari A, et al. The burden of mental  
451 disorders across the states of India: the Global Burden of Disease Study 1990–2017. *The Lancet*  
452 *Psychiatry*. 2020;7(2):148-61.
- 453 19. Su TP, Lien TC, Yang CY, Su YL, Wang JH, Tsai SL, et al. Prevalence of psychiatric morbidity  
454 and psychological adaptation of the nurses in a structured SARS caring unit during outbreak: a  
455 prospective and periodic assessment study in Taiwan. *J Psychiatr Res*. 2007;41(1-2):119-30.
- 456 20. Bjelland I, Krokstad S, Mykletun A, Dahl AA, Tell GS, Tambs K. Does a higher educational level  
457 protect against anxiety and depression? The HUNT study. *Social science & medicine*.  
458 2008;66(6):1334-45.
- 459 21. Patel V, Kirkwood BR, Pednekar S, Weiss H, Mabey D. Risk factors for common mental  
460 disorders in women. Population-based longitudinal study. *Br J Psychiatry*. 2006;189:547-55.
- 461 22. Carr D, Springer KW. Advances in Families and Health Research in the 21st Century. *Journal*  
462 *of Marriage and Family*. 2010;72(3):743-61.
- 463 23. Cheng HG, Shidhaye R, Charlson F, Deng F, Lyngdoh T, Chen S, et al. Social correlates of  
464 mental, neurological, and substance use disorders in China and India: a review. *The Lancet*  
465 *Psychiatry*. 2016;3(9):882-99.
- 466 24. Wang C, Pan R, Wan X, Tan Y, Xu L, McIntyre RS, et al. A longitudinal study on the mental  
467 health of general population during the COVID-19 epidemic in China. *Brain, behavior, and immunity*.  
468 2020.
- 469 25. Leung GM, Quah S, Ho LM, Ho SY, Hedley AJ, Lee HP, et al. Community psycho-behavioural  
470 surveillance and related impact on outbreak control in Hong Kong and Singapore during the SARS  
471 epidemic. *Hong Kong Med J*. 2009;15 Suppl 9:30-4.

472
